# Supplementary material
Source: publisher figshare collection journal article supplement (https://tandf.figshare.com/articles/dataset/_/12264962)
Supplement: Supplementary file 1 [file 1]

**Supplementary Table 2. Evidence-Based Guidelines Mapped to the Core Content of EMS Medicine**

| <b>AMERICAN BOARD OF EMERGENCY MEDICINE CORE CONTENT IN EMS MEDICINE</b> | <b>PUBLISHED EVIDENCE-BASED GUIDELINES</b>                                                                                                                                                                                 |
|--------------------------------------------------------------------------|----------------------------------------------------------------------------------------------------------------------------------------------------------------------------------------------------------------------------|
| <b><u>1.0 CLINICAL ASPECTS OF EMS MEDICINE</u></b>                       |                                                                                                                                                                                                                            |
| <b>1.1 Time / Life-Critical Conditions</b>                               |                                                                                                                                                                                                                            |
| 1.1.1 Cardiac Arrest                                                     | Atkins 2015<br>Brooks 2015<br>Brugger 2013<br>Callaway 2015<br>Ching 2017<br>de Caen 2015<br>Elsensohn 2006<br>Gordon 2015<br>Hock Ong 2013<br>Kleinman 2015<br>Lavonas 2015<br>Millin 2013<br>Wyckoff 2015<br>Zafren 2014 |
| 1.1.2 Airway Compromise / Respiratory Failure                            | Adelson 2003<br>Ahn 2011<br>Badjatia 2008<br>Berlac 2008<br>Hossfeld 2016<br>Kanani 2017<br>Mayglothling 2012<br>Moss 2013<br>O'Driscoll 2017<br>Rehn 2016                                                                 |
| 1.1.3 Hypotension and Shock                                              | de Caen 2015<br>Kanani 2017<br>Neugebauer 2012<br>Singletary 2015                                                                                                                                                          |
| 1.1.4 Altered Mental Status                                              | Sanello 2018                                                                                                                                                                                                               |
| <b>1.2 Injury</b>                                                        |                                                                                                                                                                                                                            |
| 1.2.1 Trauma                                                             | Ahn 2011<br>Battaloglu 2017<br>British Trauma Society 2003<br>Bulger 2014<br>Cotton 2009<br>Chalkias 2009<br>Connor 2013<br>Ellerton 2009<br>Gausche-Hill 2014<br>Harmsen 2017<br>Kanani 2017                              |

|                                                               |                                                                                                                                                                                                                                                                 |
|---------------------------------------------------------------|-----------------------------------------------------------------------------------------------------------------------------------------------------------------------------------------------------------------------------------------------------------------|
|                                                               | Kornhall 2017<br>Kreinst 2016<br>Leech 2016<br>Millin 2013<br>Neugebauer 2012<br>Quinn 2013<br>Singletary 2015<br>Sasser 2012<br>Stanton 2017<br>Strosberg 2016<br>Stuke 2011<br>Theodore, Arabi 2013<br>Theodore, Hadley 2013<br>Thomas 2014<br>Velopulos 2018 |
| 1.2.2 Orthopedics                                             | Battaloglu 2017<br>Ellerton 2009<br>Singletary 2015                                                                                                                                                                                                             |
| 1.2.3 Traumatic Brain Injuries                                | Adelson 2003<br>Badjatia 2008<br>Hebb 2007                                                                                                                                                                                                                      |
| 1.2.4 Assault – Domestic / Sexual / Elder Abuse / Child Abuse |                                                                                                                                                                                                                                                                 |
| 1.2.5 Environmental                                           | Belval 2018<br>Brugger 2013<br>Gordon 2015<br>MacDonald 2006<br>Zafren 2014                                                                                                                                                                                     |
| 1.3 Medical Emergencies                                       |                                                                                                                                                                                                                                                                 |
| 1.3.1 Respiratory                                             | O'Driscoll 2017<br>Singletary 2015                                                                                                                                                                                                                              |
| 1.3.2 Cardiovascular                                          | Adams 2003<br>Atkins 2015<br>Bowles 2017<br>Ching 2017<br>Kubica 2017<br>O'Connor 2015<br>Pre-Hospital Fibrinolysis 2004<br>Savino 2015<br>Singletary 2015                                                                                                      |
| 1.3.3 Neurological                                            | Boulanger 2018<br>Furyk 2017<br>Kobayashi 2018<br>Powers 2018<br>Pride 2017<br>Sanello 2018<br>Shah 2014<br>Silverman 2017                                                                                                                                      |

|                                                   |                                                                                                                                                                                                                                                                                                                                                                                                                                                                                                                                                                                                                                                                      |
|---------------------------------------------------|----------------------------------------------------------------------------------------------------------------------------------------------------------------------------------------------------------------------------------------------------------------------------------------------------------------------------------------------------------------------------------------------------------------------------------------------------------------------------------------------------------------------------------------------------------------------------------------------------------------------------------------------------------------------|
|                                                   | <p>Singletary 2015</p> <p>Stroke Foundation 2017</p>                                                                                                                                                                                                                                                                                                                                                                                                                                                                                                                                                                                                                 |
| 1.3.4 Diabetic Emergencies                        | Singletary 2015                                                                                                                                                                                                                                                                                                                                                                                                                                                                                                                                                                                                                                                      |
| 1.3.5 Renal                                       |                                                                                                                                                                                                                                                                                                                                                                                                                                                                                                                                                                                                                                                                      |
| 1.3.6 Obstetric and Gynecologic Emergencies       | <p>Battaloglu 2017</p> <p>Lavonas 2015</p>                                                                                                                                                                                                                                                                                                                                                                                                                                                                                                                                                                                                                           |
| 1.3.7 Poisoning / Toxicologic Emergencies         | <p>Singletary 2015</p> <p>Manoguerra 2005</p>                                                                                                                                                                                                                                                                                                                                                                                                                                                                                                                                                                                                                        |
| 1.3.8 Dermatology                                 |                                                                                                                                                                                                                                                                                                                                                                                                                                                                                                                                                                                                                                                                      |
| 1.3.9 Communicable Diseases                       |                                                                                                                                                                                                                                                                                                                                                                                                                                                                                                                                                                                                                                                                      |
| 1.3.10 Behavioral Emergencies                     |                                                                                                                                                                                                                                                                                                                                                                                                                                                                                                                                                                                                                                                                      |
| 1.4 Special Clinical Considerations               |                                                                                                                                                                                                                                                                                                                                                                                                                                                                                                                                                                                                                                                                      |
| 1.4.1 Airway Management in Adverse Conditions     | <p>Brugger 2013</p> <p>Zafren 2014</p>                                                                                                                                                                                                                                                                                                                                                                                                                                                                                                                                                                                                                               |
| 1.4.2 Procedures                                  | <p>Ahn 2011</p> <p>Battaloglu 2017</p> <p>Berlac 2008</p> <p>British Trauma Society 2003</p> <p>Brugger 2013</p> <p>Chalkias 2009</p> <p>Ching 2017</p> <p>Connor 2013</p> <p>Cotton 2009</p> <p>de Caen 2015</p> <p>Ellerton 2009</p> <p>Hossfeld 2016</p> <p>Kanani 2017</p> <p>Kobayashi 2018</p> <p>Kornhall 2017</p> <p>Kreinst 2016</p> <p>Leech 2016</p> <p>Link 2015</p> <p>Mayglothling 2012</p> <p>Moss 2013</p> <p>Neugebauer 2012</p> <p>O'Connor 2015</p> <p>Quinn 2013</p> <p>Rehn 2016</p> <p>Savino 2015</p> <p>Stanton 2017</p> <p>Stuke 2011</p> <p>Theodore, Arabi 2013</p> <p>Theodore, Hadley 2013</p> <p>Velopulos 2018</p> <p>Zafren 2014</p> |
| 1.4.3 Pain Assessment and Management in the Field | <p>Gausche-Hill 2004</p> <p>Kanani 2017</p>                                                                                                                                                                                                                                                                                                                                                                                                                                                                                                                                                                                                                          |

|                                                                                   |                                                                                                                    |
|-----------------------------------------------------------------------------------|--------------------------------------------------------------------------------------------------------------------|
| 1.4.4 Flight Physiology                                                           | MacDonald 2006                                                                                                     |
| 1.4.5 Pediatrics                                                                  | Adelson 2003<br>Atkins 2015<br>de Caen 2015<br>Furyk 2017<br>Hebb 2007<br>Miller 2004<br>Shah 2014<br>Wyckoff 2015 |
| 1.4.6 Geriatrics                                                                  |                                                                                                                    |
| 1.4.7 Bariatric Issues                                                            |                                                                                                                    |
| 1.4.8 End-of-Life Issues                                                          |                                                                                                                    |
| 1.4.9 Social Issues                                                               |                                                                                                                    |
| 1.5 Special Considerations for Evaluation, Treatment, Transport, and Destinations |                                                                                                                    |
| 1.5.1 Time-Life Critical Conditions                                               | Lavonas 2015                                                                                                       |
| 1.5.2 Special Patient Populations                                                 |                                                                                                                    |
| <b>2.0 MEDICAL OVERSIGHT OF EMS</b>                                               |                                                                                                                    |
| 2.1 Medical Oversight                                                             |                                                                                                                    |
| 2.1.1 Medical Oversight of EMS Systems                                            |                                                                                                                    |
| 2.1.2 Legal Issues                                                                |                                                                                                                    |
| 2.2 EMS Systems                                                                   |                                                                                                                    |
| 2.2.1 Public Safety Answering Points                                              |                                                                                                                    |
| 2.2.2 Design of System Components                                                 |                                                                                                                    |
| 2.2.3 Delivery Systems with Special Considerations                                | Thomas 2014                                                                                                        |
| 2.3 EMS Personnel                                                                 |                                                                                                                    |
| 2.3.1 Scope of Practice Models                                                    |                                                                                                                    |
| 2.3.2 Education                                                                   | Bhanji 2015<br>Miller 2004<br>Powers 2018                                                                          |
| 2.3.3 EMS Provider Health and Wellness                                            | Patterson 2018                                                                                                     |
| 2.4 System Management                                                             |                                                                                                                    |
| 2.4.1 System Finance                                                              |                                                                                                                    |
| 2.4.2 Legislation and Government                                                  |                                                                                                                    |
| 2.4.3 Public Health                                                               |                                                                                                                    |
| 2.4.4 System Status Management                                                    |                                                                                                                    |
| <b>3.0 QUALITY MANGEMENT AND RESEARCH</b>                                         |                                                                                                                    |
| 3.1 Quality Improvement Principles and Programs                                   |                                                                                                                    |
| 3.1.1 Data Collection, Management, and Analysis                                   |                                                                                                                    |
| 3.1.2 Quality Improvement Programs                                                | Kronick 2015                                                                                                       |
| 3.1.3 Evidence-based Practice                                                     |                                                                                                                    |
| 3.2 Research                                                                      |                                                                                                                    |
| 3.2.1 Data Collection, Management, and Analysis                                   |                                                                                                                    |
| 3.2.2 Fundamental Knowledge of Biostatistics and Epidemiology                     |                                                                                                                    |
| 3.2.3 EMS Research Design                                                         |                                                                                                                    |
| <b>4.0 SPECIAL OPERATIONS</b>                                                     |                                                                                                                    |

|                                                                                |                                                                              |
|--------------------------------------------------------------------------------|------------------------------------------------------------------------------|
| 4.1 Mass Casualty Management                                                   |                                                                              |
| 4.1.1 Incident Command System (ICS)                                            |                                                                              |
| 4.1.2 Triage                                                                   |                                                                              |
| 4.1.3 Patient Care in Mass Casualty Events / Scene Management                  |                                                                              |
| 4.2 Chemical / Biological / Radiological / Nuclear / Explosive (CBRNE)         |                                                                              |
| 4.2.1 Toxic Exposure / Poisoning / Hazardous Materials (HAZMAT)                |                                                                              |
| 4.2.2 Explosive Incidents                                                      |                                                                              |
| 4.2.3 Weapons of Mass Destruction and Related Injury                           |                                                                              |
| 4.3 Mass Gathering                                                             |                                                                              |
| 4.3.1 Planning and Operations                                                  |                                                                              |
| 4.3.2 Personnel Needs                                                          |                                                                              |
| 4.3.3 Training and Drills                                                      |                                                                              |
| 4.3.4 Design of Temporary Treatment Facilities                                 |                                                                              |
| 4.3.5 Equipment                                                                |                                                                              |
| 4.3.6 Communications                                                           |                                                                              |
| 4.4 Disaster Management                                                        |                                                                              |
| 4.4.1 National Incident Management System (NIMS) & National Response Framework |                                                                              |
| 4.4.2 Catastrophic Events                                                      |                                                                              |
| 4.4.3 Health and Medical Resources                                             |                                                                              |
| 4.4.4 Special Response Considerations                                          |                                                                              |
| 4.5 EMS Operations                                                             |                                                                              |
| 4.5.1 Tactical                                                                 |                                                                              |
| 4.5.2 Technical Rescue                                                         |                                                                              |
| 4.5.3 Wilderness EMS Systems                                                   | Brugger 2013<br>Ellerton 2009<br>Elsensohn 2006<br>Quinn 2013<br>Zafren 2014 |
| 4.5.4 Mobile Integrated Healthcare / Community Paramedicine                    |                                                                              |
