# Supplementary material
Source: publisher figshare collection journal article supplement (https://tandf.figshare.com/articles/dataset/_/12264962)
Supplement: Supplementary file 2 [file 1]

**Supplementary Table 1. Search Terms of Systematic Review**

| #  | Search                                                                                                                                        |
|----|-----------------------------------------------------------------------------------------------------------------------------------------------|
| 1  | exp Emergency Medical Service Communication Systems/                                                                                          |
| 2  | Exp "Transportation of Patients"/                                                                                                             |
| 3  | (pre-hospital or prehospital).ti,kw.                                                                                                          |
| 4  | Emergency Medical Services/                                                                                                                   |
| 5  | emergency medical service*.ti,kw.                                                                                                             |
| 6  | patient transport*.ti,kw.                                                                                                                     |
| 7  | (ems or emt).ti,kw.                                                                                                                           |
| 8  | Emergency Medical Technicians/                                                                                                                |
| 9  | Emergency Medical Technician*.ti,kw.                                                                                                          |
| 10 | exp Ambulances/                                                                                                                               |
| 11 | ambulance*.ti,kw.                                                                                                                             |
| 12 | emergency mobile unit*.ti,kw.                                                                                                                 |
| 13 | (air medical or air medicine).ti,kw.                                                                                                          |
| 14 | (aeromedical or aeromedicine or aero-medical or aero-medicine) .ti,kw.                                                                        |
| 15 | (paramedic* or para-medic*).ti,kw.                                                                                                            |
| 16 | exp Patient Transfer/                                                                                                                         |
| 17 | ((interhospital or inter-hospital or interfacility or inter-facility or intrafacility or intra-facility) adj3 (transfer or transport)).ti,kw. |
| 18 | transport* medicine.ti,kw.                                                                                                                    |
| 19 | emergency health service*.ti,kw.                                                                                                              |
| 20 | out-of-hospital.ti,kw.                                                                                                                        |
| 21 | or/1-20                                                                                                                                       |
| 22 | guideline*.ti,kw.                                                                                                                             |
| 23 | consensus.ti,kw.                                                                                                                              |
| 24 | recommendation*.ti,kw.                                                                                                                        |
| 25 | *consensus/                                                                                                                                   |
| 26 | *Practice Guidelines as Topic/                                                                                                                |
| 27 | 22 or 23 or 24 or 25 or 26                                                                                                                    |
| 28 | 21 or 27                                                                                                                                      |
| 29 | limit 28 to english language                                                                                                                  |
| 30 | remove duplicates from 29                                                                                                                     |
